Kerstin Tiedemann, Iris Boraschi-Diaz, Irina Rajakumar, Jasvir Kaur, Peter Roughley, Dieter P. Reinhardt and Svetlana V. Komarova

Supplemental Figure S1.

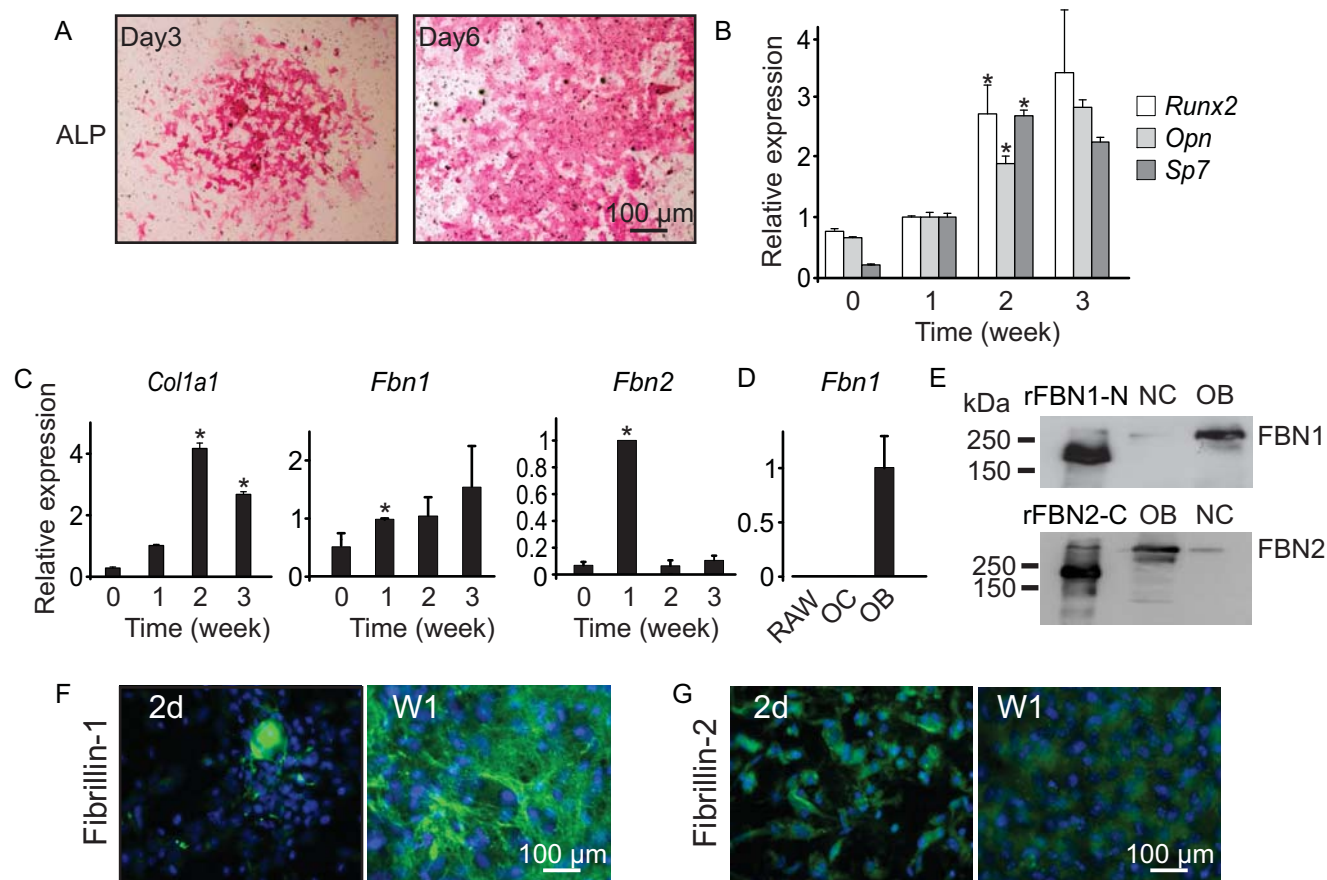

**Fig. S1.** Osteoblasts produce fibrillin-1 and -2. Mouse bone marrow cells were treated with ascorbic acid (AA; 50  $\mu\text{g/ml}$ ). (A) Osteoblast differentiation was monitored by the expression of alkaline phosphatase (ALP). (B) The expression of osteoblast marker genes including Runt-related transcription factor 2 (*Runx2*), osteopontin (*Opn*), and osterix (*Sp7*) was assessed during the differentiation period. *Runx2*, *Opn* and *Sp7* reached maximum expression after 2 weeks of culture and remained up-regulated during the third week of differentiation. (C) The expression of the extracellular matrix proteins by osteoblastic cells. Collagen type IA (*Col1a1*) gradually increased over the first two weeks of culture and remained up-regulated thereafter. Both fibrillin-1 (*Fbn1*) and fibrillin-2 (*Fbn2*) mRNA were strongly induced during the first week of osteoblast differentiation. In the subsequent weeks, *Fbn1* mRNA remained up-regulated, but the expression of *Fbn2* mRNA decreased to levels similar to undifferentiated cells. Data are means  $\pm$  SEM,  $n = 3-5$  experiments, \* $p < 0.05$  indicates significance compared to week 0 assessed by ANOVA. (D) RAW 264.7 cells (RAW) or differentiated osteoclasts (OC) do not express *Fbn1*. Mature osteoblasts (OB) were used as a positive control. (E) Differentiated osteoblasts (OB) secreted fibrillin-1 and -2 into the conditioned medium. In contrast, untreated bone marrow cells (negative control, NC) did not secrete detectable amounts of fibrillin-1 or -2. (F) Development of fibrillin-1-containing microfibrils was apparent by immunofluorescence during the first week (W1) of osteoblast differentiation. (G) Only diffuse staining was observed for fibrillin-2 in osteoblast cultures.

Kerstin Tiedemann, Iris Boraschi-Diaz, Irina Rajakumar, Jasvir Kaur, Peter Roughley, Dieter P. Reinhardt and Svetlana V. Komarova

**Supplemental Figure S2.**

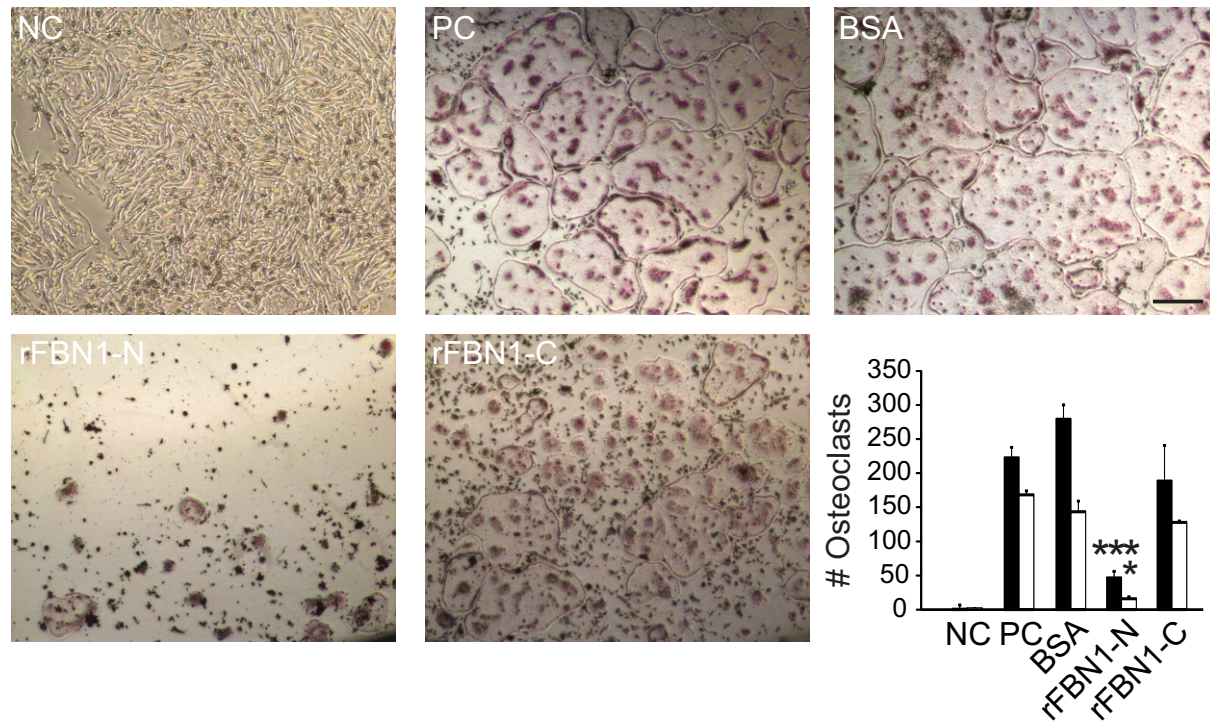

**Fig. S2.** Bovine serum albumin (BSA) does not affect osteoclast formation. RAW 264.7 cells (black bars) and mouse bone marrow cells (white bars) were cultured for 5 days untreated (negative control, NC), treated with RANKL only (50 ng/ml, positive control, PC), or treated with RANKL and BSA (50  $\mu$ g/ml), or soluble fibrillin-1 fragments rFBN1-N or rFBN1-C (50  $\mu$ g/ml). Samples were fixed and stained for TRAP. Shown are representative images of osteoclasts formed in bone marrow cultures under the indicated conditions. Scale bar of 250  $\mu$ m applies to all images. The addition of BSA did not affect osteoclast formation, only addition of rFBN1-N resulted in significant decrease in osteoclast numbers. Data are means  $\pm$  SEM, n = 3-5 independent experiments, \*p<0.05, \*\*\*p<0.001 compared to PC.

Kerstin Tiedemann<sup>1,2</sup>, Iris Boraschi-Diaz<sup>1,2</sup>, Irina Rajakumar<sup>1,#</sup>, Jasvir Kaur<sup>3</sup>, Peter Roughley<sup>2</sup>, Dieter P. Reinhardt<sup>1,3,†</sup> and Svetlana V. Komarova<sup>1,2,3,†\*</sup>

Supplemental Information S3.

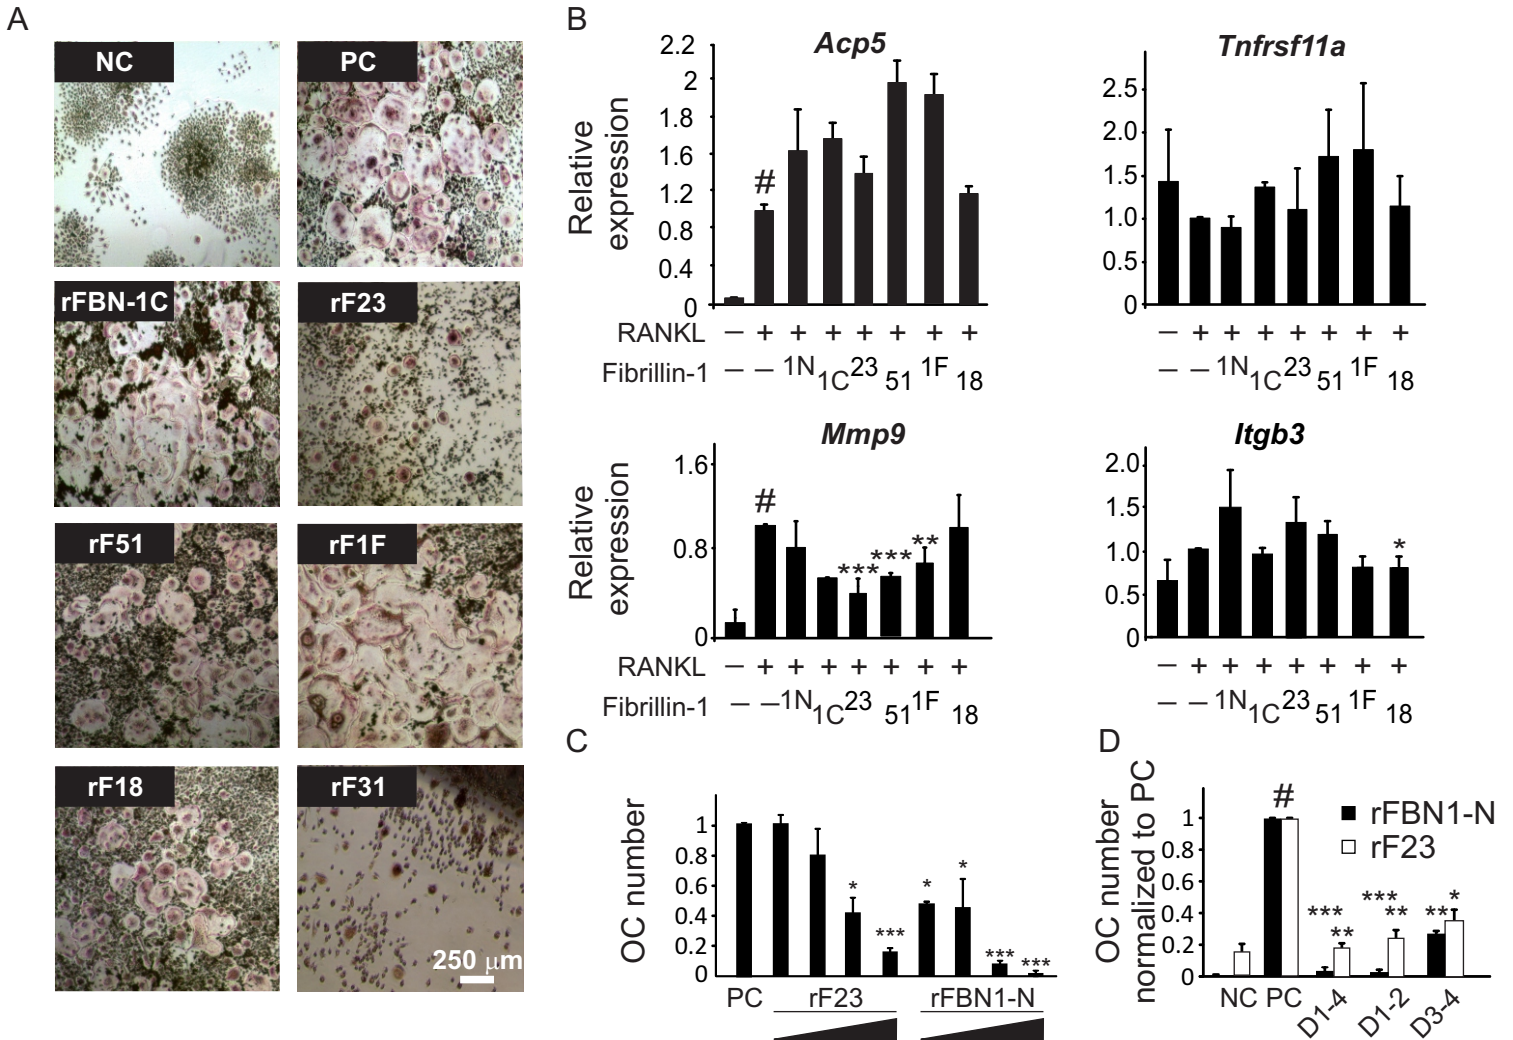

**Fig. S3.** Effect of fibrillin-1 fragments on osteoclast formation and gene expression. (A) Representative images of osteoclasts formed from RAW 264.7 monocytes after addition of soluble rFBN1-N, rFBN1-C, rF23, rF51, rF1F, or rF18 (50 µg/ml) for the duration of the experiment. Scale bar applies to all images. (B) RAW 264.7 cells were cultured for 5 days untreated, treated with RANKL only (50 ng/ml), or treated with RANKL and soluble rFBN1-N, rFBN1-C, rF23, rF51, rF1F, or rF18 (50 µg/ml), and mRNA expression of tartrate resistant acid phosphatase (*Acp5*), receptor activator of nuclear factor B (*Tnfrsf11a*), metalloproteinase 9 (*Mmp9*) and integrin β3 (*Itgb3*) was assessed. RANKL treatment alone significantly increased gene expression of *Acp5* and *Mmp9*. rF23, rF51, and rF1F significantly decreased gene expression of *Mmp9*. Data are means ± SEM, n = 3 experiments, \*\*\*p < 0.001, compared to PC as assessed by t test; # p < 0.05, compared to NC as assessed by t-test. (C) Bone marrow cells were cultured with 50 ng/ml MCSF and RANKL for 4 days with or without rF23 and rFBN1-N in concentrations of 6.25, 12.5, 25 and 50 µg/ml. (D) Bone marrow cells were cultured with 50 ng/ml MCSF and RANKL for 4 days with or without rF23 and rFBN1-N added for the duration of the experiment (day 1-4, D1-4), for the first 2 days only (D1-2), or for the last 2 days only (D3-4). Data are means ± SEM, n = 3 experiments normalized to osteoclast numbers observed in positive control (PC), \*p < 0.05, \*\*p < 0.01, \*\*\*p < 0.001 compared to positive control as assessed by t-test; # p < 0.05, compared to negative control (NC) as determined by t-test.

Fibrillin-1 directly regulates osteoclast formation and function by a dual mechanism

Kerstin Tiedemann<sup>1,2</sup>, Iris Boraschi-Diaz<sup>1,2</sup>, Irina Rajakumar<sup>1,#</sup>, Jasvir Kaur<sup>3</sup>, Peter Roughley<sup>2</sup>, Dieter P. Reinhardt<sup>1,3,¶</sup> and Svetlana V. Komarova<sup>1,2,3,¶\*</sup>

**Supplemental Figure S4.**

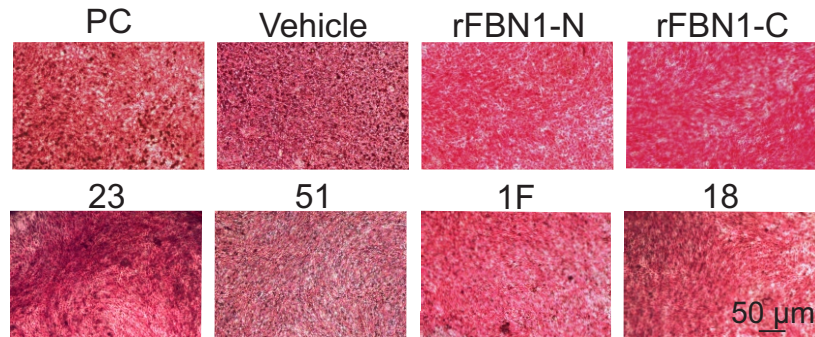

**Fig. S4.** Fibrillin-1 has no effect on osteoblast differentiation. Osteoblast differentiation of mouse bone marrow cells was induced with ascorbic acid (50  $\mu\text{g}/\text{ml}$ ) in the absence (positive control, PC) or presence of vehicle (Tris-based buffer) or soluble fibrillin-1 fragments (50  $\mu\text{g}/\text{ml}$ ), rFBN1-N, rFBN1-C, rF23 (23), rF51 (51), rF1F (1F) and rF18 (18). After 1 week, cells were fixed and stained for ALP (red). Shown are representative images of osteoblastic cells formed under different conditions. Scale bar applies to all images.

Kerstin Tiedemann, Iris Boraschi-Diaz, Irina Rajakumar, Jasvir Kaur, Peter Roughley, Dieter P. Reinhardt and Svetlana V. Komarova

**Supplemental Figure S5.**

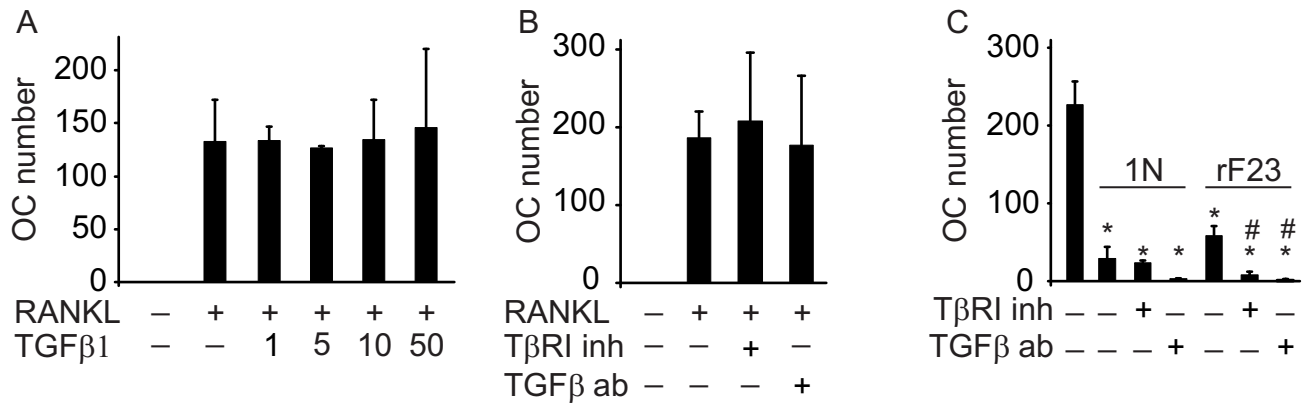

**Fig. S5.** TGFβ does not affect osteoclastogenesis in the cell culture model used. (A) RAW 264.7 cells were cultured for 5 days untreated or treated with RANKL (50 ng/ml) and recombinant TGFβ1 (1-50 ng/ml) and osteoclast numbers were quantified. (B) Mouse bone marrow cells were treated with MCSF (50 ng/ml) and RANKL (50 ng/ml) in the presence of TGFβ receptor I inhibitor (TβRI inh, 5 μM) or neutralizing antibody against TGFβ1 (TGFβ ab, 15 μg/ml) and osteoclast numbers were determined. For A and B, data are means ± SEM, n=3-5 experiments, no significant differences between RANKL-treated conditions. (C) Inhibition of TGFβ minimally affects anti-osteoclastogenic effect of fibrillin-1 fragments. Bone marrow cells were cultured for 5 days with MCSF and RANKL without (positive control) or with 50 μg/ml of rFBN1-N or rF23 in the absence or presence of TβRI inhibitor (5 μM) or TGFβ neutralizing antibody (15 μg/ml), and osteoclast numbers were counted. Data are means ± SEM, n = 3-5 experiments, \*p < 0.001 indicates significance compared to positive control and #p < 0.05 indicates significance compared to the samples without inhibitors, as determined by t-test.

Fibrillin-1 directly regulates osteoclast formation and function by a dual mechanism

Kerstin Tiedemann<sup>1,2</sup>, Iris Boraschi-Diaz<sup>1,2</sup>, Irina Rajakumar<sup>1,#</sup>, Jasvir Kaur<sup>3</sup>, Peter Roughley<sup>2</sup>, Dieter P. Reinhardt<sup>1,3,¶</sup> and Svetlana V. Komarova<sup>1,2,3,¶\*</sup>

**Supplemental Figure S6.**

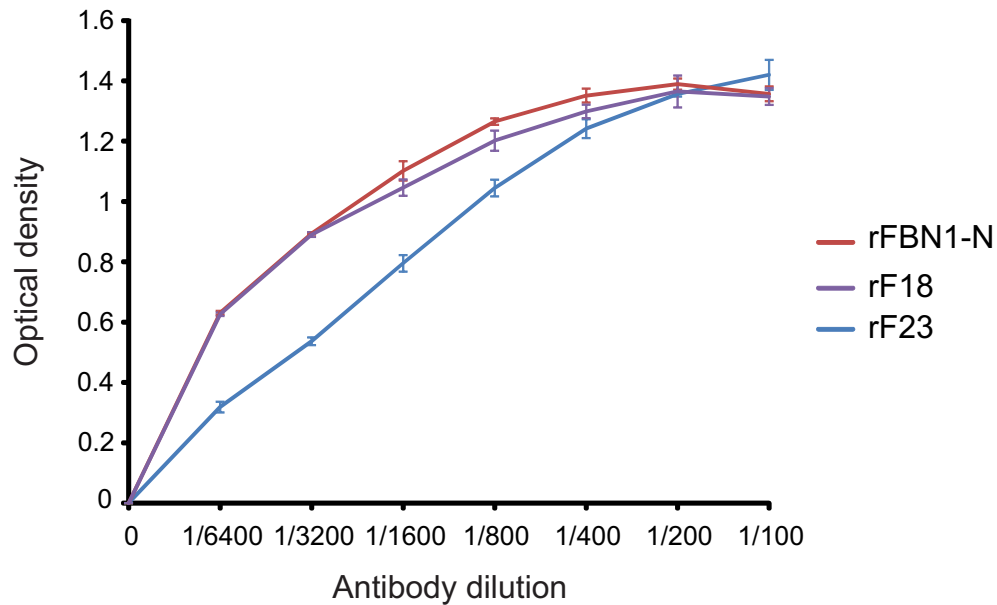

**Fig. S6.** Efficiency of the detector antibody for rFBN1-N and its fragments rF18 and rF23. ELISA demonstrates similar titers for rFBN1-N and the tested fragments. Background values without coated proteins were  $\leq 0.075$ . Data are means  $\pm$  SD,  $n = 3$  for rFBN1-N and rF23, and  $n = 2$  for rF18.

**Supplemental Figure S7.**

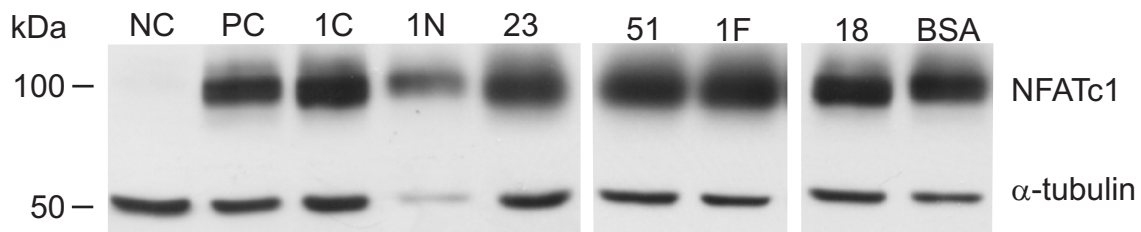

**Fig. S7.** NFAT protein levels are not affected by fibrillin-1 fragments. RAW 264.7 cells were either untreated (NC) or treated with RANKL (50 ng/ml, PC) alone or RANKL and rFBN1-C (1C), rFBN1-N (1N), rF23 (23), rF51 (51), rF1F (1F), rF18 (18) or BSA (50  $\mu$ g/ml) for 3 days. Cell lysates were collected and NFATc1 protein levels were assessed using immunoblotting,  $\alpha$ -tubulin was used as a loading control. Fibrillin-1 fragments did not affect protein level of NFATc1. Data are representative of three independent experiments.
